# Supplementary material for: Circulating levels of C-reactive protein, interleukin-6 and tumor necrosis factor-α and risk of colorectal adenomas: a meta-analysis
Source: PubMed Central journal article supplement (PMC5325449; doi:10.18632/oncotarget.11853), 2016-09-06
Supplement: oncotarget-07-64371-s001.pdf [file oncotarget-07-64371-s001.pdf]

## **Circulating levels of C-reactive protein, interleukin-6 and tumor necrosis factor- $\alpha$ and risk of colorectal adenomas: a meta-analysis**

### **APPENDIX TABLES AND FIGURES**

#### **Appendix 1: PRISMA 2009 checklist**

See Appendix File 1

Appendix 2: Search strategy

| Search (Pubmed) | Query                            | Results in Pubmed | Results in Embase and Medline |
|-----------------|----------------------------------|-------------------|-------------------------------|
| #1              | C-reactive protein               | 56,771            | 116,090                       |
| #2              | CRP                              | 33,347            | 61,194                        |
| #3              | Interleukin-6                    | 65,240            | 162,423                       |
| #4              | IL-6                             | 98,659            | 108,295                       |
| #5              | tumor necrosis factor*           | 153,616           | 269,136                       |
| #6              | TNF*                             | 153,683           | 203,214                       |
| #7              | colorectal                       | 123,928           | 197,089                       |
| #8              | colon                            | 176,992           | 318,533                       |
| #9              | rectal                           | 98,711            | 118,864                       |
| #10             | Neoplas*                         | 2,391,690         | 952,140                       |
| #11             | polyp*                           | 169,616           | 339,423                       |
| #12             | adenoma*                         | 100,288           | 117,686                       |
| #13             | #1 OR #2 OR #3 OR #4 OR #5 OR #6 | 286,379           | 507,830                       |
| #14             | #7 OR #8 OR #9                   | 334,972           | 526,386                       |
| #15             | #10 OR #11 OR #12                | 2,557,943         | 1,338,980                     |
| #16             | #13 AND #14 AND #15              | 2,957             | 3,367                         |

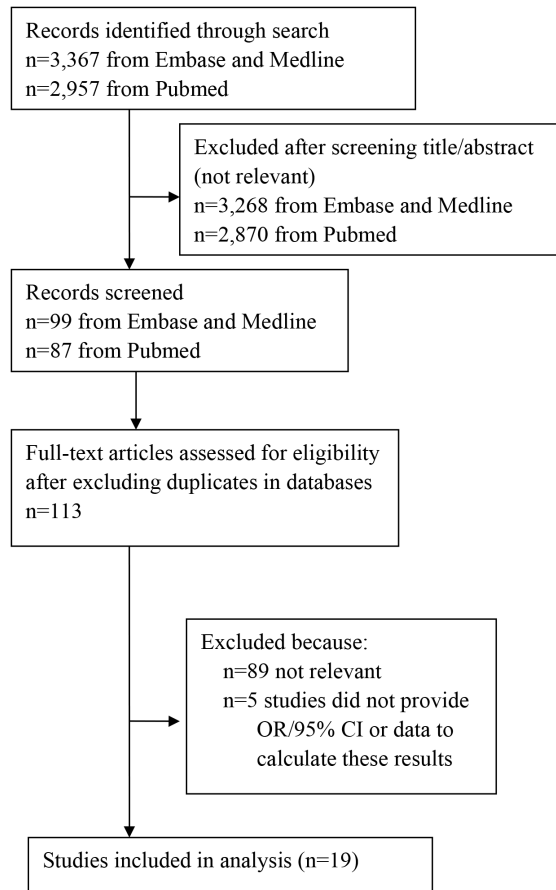

**Appendix 3: Characteristics of studies on CRP, IL-6 and TNF- $\alpha$  included in the meta-analysis**

See Appendix File 3

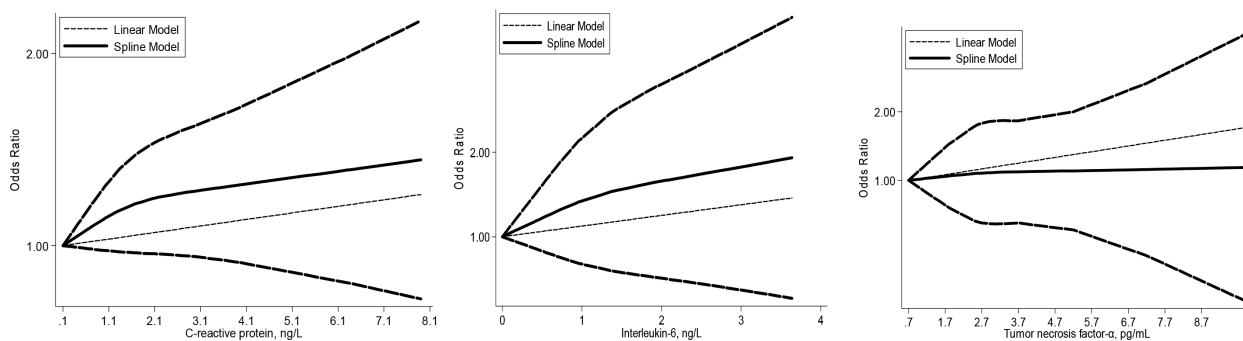

**Appendix 4: Dose-resposne analysis.** The dose–response analysis between circulating levels of C-reactive protein, interleukin-6 and tumor necrosis factor- $\alpha$  and risk of colorectal adenomas. The solid and long dash lines represent the estimated odds ratio and 95% confidence intervals. The short dash lines represent the linear relation. The vertical axis is on a log scale. We used the lowest value in the included studies as the reference level.
